# Supplementary material for: Electrochemical nitrate reduction to NH3 by faceted Cu2O nanostructures in acidic medium
Source: Royal Society of Chemistry journal article supplement (doi:10.1039/d4nj03823a), 2024-01-01
Supplement: d4nj03823a1.pdf [file d4nj03823a1.pdf]

## Supporting Information

### Electrochemical Nitrate Reduction to $\text{NH}_3$ by Faceted $\text{Cu}_2\text{O}$ Nanostructures in Acidic Medium

*Pranay Chandra Mandal, Ningma Dorzi Sherpa, Hiranmay Barma, Buban Adhikary and Nitish Roy*

*Department of Chemistry, University of North Bengal, Raja Rammohunpur, West Bengal 734013, India*

#### **Analysis of Electrochemical $\text{NO}_3^-$ Reduction Product and Quantification**

**Preparation of standard  $\text{NH}_3$  solution:** To prepare a standard  $\text{NH}_4\text{Cl}$  solution 38.20 mg of  $\text{NH}_4\text{Cl}$  was dissolved in 100 mL DI water and further diluted as per requirement.

**Preparation of standard phenol solution:** 5 mL phenol was added to 45 mL of ethanol to obtain 50 mL of 1.0 M phenol solution.

**Preparation of standard sodium nitroprusside solution:** To prepare a 17 mM 50 mL solution of sodium nitroprusside, 200 mg sodium nitroprusside was into 50 mL water.

**Preparation of standard sodium hypochlorite solution:** An alkaline solution of tri-sodium citrate and sodium hydroxide was prepared by dissolving 20 g sodium citrate and 1 g NaOH in 100 mL DI water. Finally, this alkaline solution and sodium hypochlorite was added in 4:1 ratio to obtain alkaline sodium hypochlorite solution for colorimetric  $\text{NH}_3$  detection.

**Detection and quantification of  $\text{NH}_3$  in the reaction mixture:**  $\text{NH}_3$  produced in electrochemical  $\text{NO}_3^-$  reduction by the  $\text{Cu}_2\text{O}$  based NCs was detected by the IPB method using phenol, sodium nitroprusside and alkaline sodium hypochlorite

solution. First, after electrochemical  $\text{NO}_3\text{RR}$  for 3h, 2 mL aliquot of the electrolyte was taken out and 3 mL of 1.0 M NaOH solution was added into it to make the solution alkaline. From this alkaline electrolyte solution, 1 mL diluted electrolyte solution was taken up and mixed with 7 mL DI water. To this solution, 500  $\mu\text{L}$ , 500  $\mu\text{L}$  and 1 mL of previously prepared phenol, sodium nitroprusside and sodium hypochlorite solution was added respectively and kept for 2 h incubation at ambient condition. This IPB coloured solution was further diluted as required to detect UV-Vis spectra at the reasonable absorption maxima value. In fact, a total of 50-time dilution was made prior to detection of  $\text{NH}_3$  through UV-Vis spectra. The UV-Vis spectrum of the solution was recorded by a single beam UV-Vis spectrophotometer and the absorbance value at 630 nm was determined. A series of known concentrations of  $\text{NH}_4\text{Cl}$  solution were used to calibrate the absorbance values.

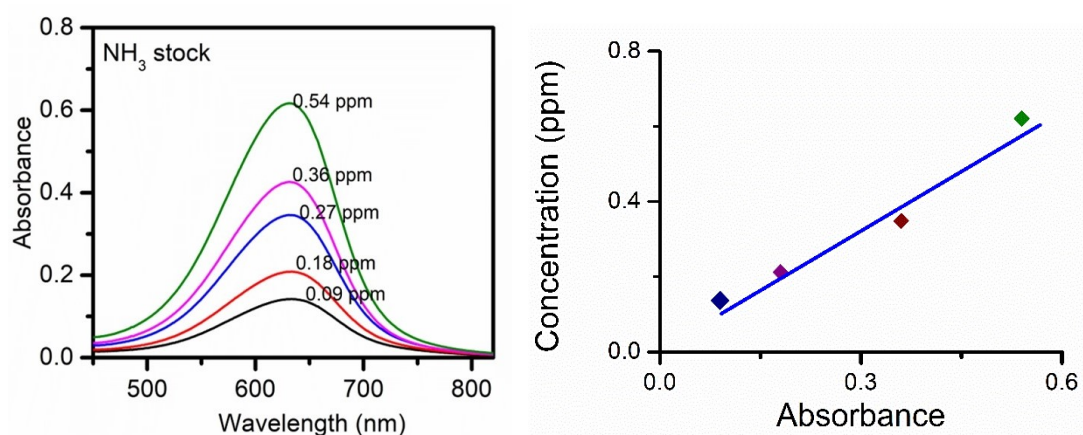

**Fig. SI 1.** (Left side) Indo-phenol complex formation at different concentration of  $\text{NH}_3$  as shown in the graph. (Right side) Linear relationship of the Indo-phenol complex with  $\text{NH}_3$  concentration at 630 nm passing through the origin.
